# Supplementary material for: Comparison of CHOP‐19 and CHOP‐25 for treatment of peripheral nodal B‐cell lymphoma in dogs: A European multicenter retrospective cohort study
Source: PubMed Central journal article supplement (PMC11586558; doi:10.1111/jvim.17222), 2024-10-18

**SUPPLEMENTARY FIGURE 1:** Boxplots of number of neutropenias against delivered RDI, for vincristine (left), cyclophosphamide (center) and doxorubicin (right). Pearson's correlation coefficient ( $r$ ) and Spearman's rank correlation coefficient ( $\rho$ ) are shown in text on each plot.

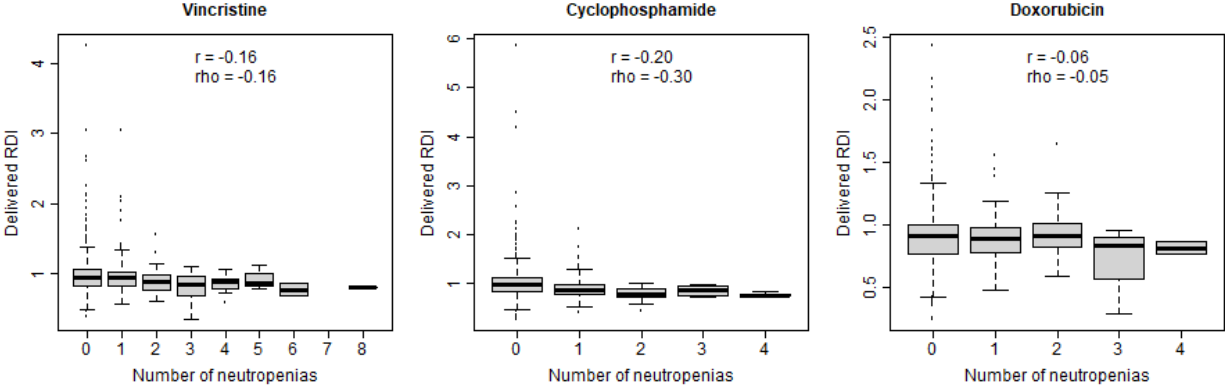

Supplement: JVIM-38-3193-s001.pdf [file JVIM-38-3193-s001.pdf]
